# Supplementary material for: Self-Supervised Convolutional Neural Network Learning in a Hybrid Approach Framework to Estimate Chlorophyll and Nitrogen Content of Maize from Hyperspectral Images
Source: MDPI journal article supplement (doi:10.3390/rs15194765), 2023-09-28
Supplement: s1 [file s1]

## Supplementary Material

Table S1: **CNC estimation using Self-Supervised learning.** Results obtained on Grosseto CCC and CNC test sets using different hyperparameters to estimate the CNC parameter. The model was trained for 1500 epochs for each experiment using the SGD optimizer.

|           |                    | Non-static    |               | Static    |             | Random    |             |
|-----------|--------------------|---------------|---------------|-----------|-------------|-----------|-------------|
| <b>LR</b> | <b>Layers</b>      | <b>R2</b>     | <b>RMSE</b>   | <b>R2</b> | <b>RMSE</b> | <b>R2</b> | <b>RMSE</b> |
| 0.05      | [102, 12, 1]       | 0.8686        | 1.0044        | 0.8766    | 0.9736      | 0.8588    | 1.0412      |
| 0.01      | [102, 12, 1]       | 0.8609        | 1.0334        | 0.8763    | 0.9744      | 0.9034    | 0.8613      |
| 0.005     | [102, 12, 1]       | 0.9152        | 0.8069        | 0.8659    | 1.0146      | 0.8615    | 1.0313      |
| 0.05      | [102, 25, 1]       | 0.8910        | 0.9150        | 0.8645    | 1.0199      | 0.9064    | 0.8480      |
| 0.01      | [102, 25, 1]       | 0.8759        | 0.9763        | 0.8589    | 1.0410      | 0.7937    | 1.2587      |
| 0.005     | [102, 25, 1]       | 0.8762        | 0.9752        | 0.8287    | 1.1467      | 0.8388    | 1.1125      |
| 0.05      | [102, 51, 1]       | 0.8738        | 0.9844        | 0.8560    | 1.0514      | 0.8610    | 1.0331      |
| 0.01      | [102, 51, 1]       | <b>0.9186</b> | <b>0.7908</b> | 0.8576    | 1.0456      | 0.8415    | 1.1033      |
| 0.005     | [102, 51, 1]       | 0.8959        | 0.8939        | 0.8401    | 1.1081      | 0.8500    | 1.0733      |
| 0.05      | [102, 102, 1]      | 0.8416        | 1.1027        | 0.8649    | 1.0186      | 0.8167    | 1.1863      |
| 0.01      | [102, 102, 1]      | 0.8961        | 0.8930        | 0.8597    | 1.0379      | 0.8395    | 1.1102      |
| 0.005     | [102, 102, 1]      | 0.8778        | 0.9688        | 0.8366    | 1.1201      | 0.7631    | 1.3488      |
| 0.05      | [102, 51, 25, 1]   | 0.8618        | 1.0301        | 0.8669    | 1.0109      | 0.8664    | 1.0129      |
| 0.01      | [102, 51, 25, 1]   | 0.8958        | 0.8944        | 0.8530    | 1.0626      | 0.8527    | 1.0634      |
| 0.005     | [102, 51, 25, 1]   | 0.8823        | 0.9506        | 0.8426    | 1.0994      | 0.8621    | 1.0291      |
| 0.05      | [102, 51, 51, 1]   | 0.9083        | 0.8392        | 0.8805    | 0.9579      | 0.8782    | 0.9669      |
| 0.01      | [102, 51, 51, 1]   | 0.9140        | 0.8126        | 0.8527    | 1.0635      | 0.8403    | 1.1075      |
| 0.005     | [102, 51, 51, 1]   | 0.8963        | 0.8922        | 0.8516    | 1.0674      | 0.8996    | 0.8779      |
| 0.05      | [102, 102, 51, 1]  | 0.8518        | 1.0668        | 0.8761    | 0.9752      | 0.8500    | 1.0730      |
| 0.01      | [102, 102, 51, 1]  | 0.8790        | 0.9640        | 0.8426    | 1.0992      | 0.8699    | 0.9996      |
| 0.005     | [102, 102, 51, 1]  | 0.8845        | 0.9419        | 0.8471    | 1.0837      | 0.8536    | 1.0603      |
| 0.05      | [102, 102, 102, 1] | 0.8816        | 0.9534        | 0.8701    | 0.9986      | 0.7856    | 1.2829      |
| 0.01      | [102, 102, 102, 1] | 0.8567        | 1.0491        | 0.8611    | 1.0328      | 0.9109    | 0.8274      |
| 0.005     | [102, 102, 102, 1] | 0.9028        | 0.8639        | 0.8669    | 1.0109      | 0.8766    | 0.9733      |
| Average:  |                    | <b>0.8836</b> | <b>0.9418</b> | 0.8582    | 1.0423      | 0.8533    | 1.0534      |

Table S2: **CCC estimation using Self-Supervised learning.** Results obtained on Grosseto CCC and CNC test sets using different hyperparameters to estimate the CCC parameter. The model was trained for 1500 epochs for each experiment using the SGD optimizer.

|           |                    | Non-static |             | Static        |               | Random    |             |
|-----------|--------------------|------------|-------------|---------------|---------------|-----------|-------------|
| <b>LR</b> | <b>Layers</b>      | <b>R2</b>  | <b>RMSE</b> | <b>R2</b>     | <b>RMSE</b>   | <b>R2</b> | <b>RMSE</b> |
| 0.05      | [102, 12, 1]       | 0.8299     | 0.2504      | 0.7449        | 0.3066        | 0.7472    | 0.3052      |
| 0.01      | [102, 12, 1]       | 0.7831     | 0.2827      | 0.8147        | 0.2613        | 0.7619    | 0.2962      |
| 0.005     | [102, 12, 1]       | 0.8000     | 0.2715      | 0.8062        | 0.2673        | 0.7990    | 0.2721      |
| 0.05      | [102, 25, 1]       | 0.8167     | 0.2599      | 0.8237        | 0.2549        | 0.7789    | 0.2854      |
| 0.01      | [102, 25, 1]       | 0.8052     | 0.2680      | 0.8063        | 0.2672        | 0.7070    | 0.3286      |
| 0.005     | [102, 25, 1]       | 0.7575     | 0.2990      | 0.8160        | 0.2604        | 0.8232    | 0.2553      |
| 0.05      | [102, 51, 1]       | 0.7635     | 0.2952      | 0.7737        | 0.2888        | 0.7893    | 0.2787      |
| 0.01      | [102, 51, 1]       | 0.7669     | 0.2931      | 0.8314        | 0.2493        | 0.6651    | 0.3513      |
| 0.005     | [102, 51, 1]       | 0.7853     | 0.2813      | 0.8113        | 0.2637        | 0.6735    | 0.3469      |
| 0.05      | [102, 102, 1]      | 0.8201     | 0.2575      | 0.8196        | 0.2579        | 0.7285    | 0.3163      |
| 0.01      | [102, 102, 1]      | 0.8048     | 0.2682      | 0.8267        | 0.2527        | 0.7236    | 0.3191      |
| 0.005     | [102, 102, 1]      | 0.8267     | 0.2528      | 0.8007        | 0.2710        | 0.7487    | 0.3043      |
| 0.05      | [102, 51, 25, 1]   | 0.7528     | 0.3018      | 0.7863        | 0.2806        | 0.7495    | 0.3038      |
| 0.01      | [102, 51, 25, 1]   | 0.8249     | 0.2541      | 0.8070        | 0.2667        | 0.8027    | 0.2697      |
| 0.005     | [102, 51, 25, 1]   | 0.8289     | 0.2511      | 0.8105        | 0.2643        | 0.7650    | 0.2943      |
| 0.05      | [102, 51, 51, 1]   | 0.7993     | 0.2720      | 0.8024        | 0.2699        | 0.7725    | 0.2896      |
| 0.01      | [102, 51, 51, 1]   | 0.8117     | 0.2634      | 0.8044        | 0.2685        | 0.8156    | 0.2607      |
| 0.005     | [102, 51, 51, 1]   | 0.7747     | 0.2881      | 0.7831        | 0.2827        | 0.7894    | 0.2786      |
| 0.05      | [102, 102, 51, 1]  | 0.8157     | 0.2606      | 0.8204        | 0.2573        | 0.7181    | 0.3223      |
| 0.01      | [102, 102, 51, 1]  | 0.8266     | 0.2528      | 0.8073        | 0.2665        | 0.7950    | 0.2749      |
| 0.005     | [102, 102, 51, 1]  | 0.7983     | 0.2726      | 0.8235        | 0.2550        | 0.6871    | 0.3396      |
| 0.05      | [102, 102, 102, 1] | 0.7703     | 0.2910      | 0.8147        | 0.2613        | 0.7763    | 0.2871      |
| 0.01      | [102, 102, 102, 1] | 0.8029     | 0.2695      | <b>0.8318</b> | <b>0.2490</b> | 0.6919    | 0.3370      |
| 0.005     | [102, 102, 102, 1] | 0.8040     | 0.2688      | 0.8180        | 0.2590        | 0.7107    | 0.3265      |
| Average:  |                    | 0.7987     | 0.2719      | <b>0.8077</b> | <b>0.2659</b> | 0.7508    | 0.3018      |

Table S3: **CCC estimation using MLP and PCA.** Results obtained on Grosseto CCC test sets using only the MLP regressor and PCA features in input with different hyperparameters to estimate the CCC parameter. The model was trained for 1500 epochs for each experiment using the SGD optimizer.

|          |                    | PCA-05 |        | PCA-10 |        | PCA-15        |               | PCA-20 |        |
|----------|--------------------|--------|--------|--------|--------|---------------|---------------|--------|--------|
| LR       | dims               | R2     | RMSE   | R2     | RMSE   | R2            | RMSE          | R2     | RMSE   |
| 0.05     | [pca, 12, 1]       | 0.7356 | 0.3122 | 0.809  | 0.2653 | 0.7882        | 0.2794        | 0.8157 | 0.2606 |
| 0.01     | [pca, 12, 1]       | 0.7922 | 0.2768 | 0.7982 | 0.2727 | 0.7782        | 0.2859        | 0.7904 | 0.2779 |
| 0.005    | [pca, 12, 1]       | 0.3463 | 0.4908 | 0.795  | 0.2748 | 0.772         | 0.2899        | 0.7692 | 0.2917 |
| 0.05     | [pca, 25, 1]       | 0.6883 | 0.3389 | 0.8021 | 0.2701 | 0.793         | 0.2762        | 0.7924 | 0.2766 |
| 0.01     | [pca, 25, 1]       | 0.7707 | 0.2907 | 0.8132 | 0.2624 | 0.7941        | 0.2755        | 0.7869 | 0.2803 |
| 0.005    | [pca, 25, 1]       | 0.7847 | 0.2817 | 0.6981 | 0.3336 | 0.7607        | 0.297         | 0.7755 | 0.2876 |
| 0.05     | [pca, 51, 1]       | 0.7357 | 0.3121 | 0.8138 | 0.2619 | <b>0.8275</b> | <b>0.2521</b> | 0.7316 | 0.3145 |
| 0.01     | [pca, 51, 1]       | 0.7656 | 0.2939 | 0.801  | 0.2708 | 0.7913        | 0.2773        | 0.7761 | 0.2872 |
| 0.005    | [pca, 51, 1]       | 0.7917 | 0.2771 | 0.7607 | 0.297  | 0.7721        | 0.2898        | 0.8091 | 0.2653 |
| 0.05     | [pca, 102, 1]      | 0.7945 | 0.2752 | 0.8141 | 0.2617 | 0.8151        | 0.261         | 0.7852 | 0.2814 |
| 0.01     | [pca, 102, 1]      | 0.7707 | 0.2907 | 0.7897 | 0.2784 | 0.7481        | 0.3047        | 0.7565 | 0.2996 |
| 0.005    | [pca, 102, 1]      | 0.6874 | 0.3394 | 0.7673 | 0.2928 | 0.8057        | 0.2676        | 0.7562 | 0.2998 |
| 0.05     | [pca, 51, 25, 1]   | 0.7576 | 0.2989 | 0.7987 | 0.2723 | 0.7895        | 0.2785        | 0.7961 | 0.2741 |
| 0.01     | [pca, 51, 25, 1]   | 0.492  | 0.4327 | 0.809  | 0.2653 | 0.791         | 0.2775        | 0.7864 | 0.2806 |
| 0.005    | [pca, 51, 25, 1]   | 0.7514 | 0.3027 | 0.7773 | 0.2865 | 0.7302        | 0.3153        | 0.751  | 0.3029 |
| 0.05     | [pca, 51, 51, 1]   | 0.7724 | 0.2896 | 0.7854 | 0.2812 | 0.8072        | 0.2666        | 0.7977 | 0.2731 |
| 0.01     | [pca, 51, 51, 1]   | 0.5873 | 0.39   | 0.5642 | 0.4008 | 0.8042        | 0.2686        | 0.797  | 0.2735 |
| 0.005    | [pca, 51, 51, 1]   | 0.6822 | 0.3423 | 0.6877 | 0.3392 | 0.7916        | 0.2771        | 0.8092 | 0.2652 |
| 0.05     | [pca, 102, 51, 1]  | 0.7423 | 0.3082 | 0.781  | 0.2841 | 0.8166        | 0.26          | 0.7957 | 0.2744 |
| 0.01     | [pca, 102, 51, 1]  | 0.6511 | 0.3586 | 0.7881 | 0.2795 | 0.7898        | 0.2784        | 0.6595 | 0.3542 |
| 0.005    | [pca, 102, 51, 1]  | 0.6405 | 0.364  | 0.7522 | 0.3022 | 0.7801        | 0.2847        | 0.6066 | 0.3808 |
| 0.05     | [pca, 102, 102, 1] | 0.7208 | 0.3208 | 0.7704 | 0.2909 | 0.7878        | 0.2797        | 0.7878 | 0.2796 |
| 0.01     | [pca, 102, 102, 1] | 0.7127 | 0.3254 | 0.7874 | 0.2799 | 0.7851        | 0.2814        | 0.7897 | 0.2784 |
| 0.005    | [pca, 102, 102, 1] | 0.7564 | 0.2996 | 0.4268 | 0.4596 | 0.7729        | 0.2893        | 0.7496 | 0.3038 |
| Average: |                    | 0.7054 | 0.3255 | 0.7579 | 0.2951 | <b>0.7872</b> | <b>0.2797</b> | 0.7696 | 0.2901 |

Table S4: **CNC estimation using MLP and PCA.** Results obtained on Grosseto CNC test sets using only the MLP regressor and PCA features in input with different hyperparameters to estimate the CNC parameter. The model was trained for 1500 epochs for each experiment using the SGD optimizer.

|          |                    | PCA-05 |        | PCA-10        |               | PCA-15        |               | PCA-20 |        |
|----------|--------------------|--------|--------|---------------|---------------|---------------|---------------|--------|--------|
| LR       | dims               | R2     | RMSE   | R2            | RMSE          | R2            | RMSE          | R2     | RMSE   |
| 0.05     | [pca, 12, 1]       | 0.8576 | 1.0458 | 0.8421        | 1.101         | 0.8264        | 1.1547        | 0.8135 | 1.1966 |
| 0.01     | [pca, 12, 1]       | 0.8022 | 1.2324 | 0.8659        | 1.0147        | 0.8533        | 1.0613        | 0.8397 | 1.1096 |
| 0.005    | [pca, 12, 1]       | 0.7651 | 1.343  | 0.8907        | 0.9162        | 0.8569        | 1.0482        | 0.7626 | 1.3501 |
| 0.05     | [pca, 25, 1]       | 0.8467 | 1.0849 | 0.8169        | 1.1858        | 0.8686        | 1.0044        | 0.8627 | 1.0268 |
| 0.01     | [pca, 25, 1]       | 0.8047 | 1.2244 | 0.8584        | 1.0426        | 0.8739        | 0.9839        | 0.8838 | 0.9444 |
| 0.005    | [pca, 25, 1]       | 0.7897 | 1.2706 | 0.8841        | 0.9434        | 0.8759        | 0.9762        | 0.8724 | 0.9899 |
| 0.05     | [pca, 51, 1]       | 0.8045 | 1.2253 | 0.8659        | 1.0149        | 0.8599        | 1.0371        | 0.8644 | 1.0205 |
| 0.01     | [pca, 51, 1]       | 0.7184 | 1.4705 | 0.8584        | 1.0428        | 0.8727        | 0.9888        | 0.8844 | 0.9421 |
| 0.005    | [pca, 51, 1]       | 0.8013 | 1.2353 | 0.8768        | 0.9725        | 0.8833        | 0.9468        | 0.8434 | 1.0966 |
| 0.05     | [pca, 102, 1]      | 0.8231 | 1.1655 | 0.8628        | 1.0264        | 0.8701        | 0.9985        | 0.8519 | 1.0663 |
| 0.01     | [pca, 102, 1]      | 0.7956 | 1.2529 | 0.8719        | 0.9917        | 0.8371        | 1.1183        | 0.8605 | 1.0351 |
| 0.005    | [pca, 102, 1]      | 0.8372 | 1.1181 | 0.8521        | 1.0656        | 0.8679        | 1.0071        | 0.8457 | 1.0884 |
| 0.05     | [pca, 51, 25, 1]   | 0.8161 | 1.1882 | 0.8356        | 1.1237        | 0.8571        | 1.0474        | 0.8547 | 1.0561 |
| 0.01     | [pca, 51, 25, 1]   | 0.8549 | 1.0555 | 0.884         | 0.9436        | 0.8763        | 0.9745        | 0.8687 | 1.0042 |
| 0.005    | [pca, 51, 25, 1]   | 0.7996 | 1.2404 | 0.8819        | 0.9521        | 0.8772        | 0.971         | 0.8793 | 0.9627 |
| 0.05     | [pca, 51, 51, 1]   | 0.8387 | 1.1128 | 0.8692        | 1.002         | 0.8695        | 1.0011        | 0.8689 | 1.0034 |
| 0.01     | [pca, 51, 51, 1]   | 0.7378 | 1.4189 | 0.8567        | 1.049         | 0.8521        | 1.0658        | 0.7994 | 1.2411 |
| 0.005    | [pca, 51, 51, 1]   | 0.8028 | 1.2304 | 0.8684        | 1.0051        | 0.8535        | 1.0607        | 0.8773 | 0.9707 |
| 0.05     | [pca, 102, 51, 1]  | 0.8101 | 1.2075 | 0.7862        | 1.2812        | 0.8513        | 1.0684        | 0.8712 | 0.9945 |
| 0.01     | [pca, 102, 51, 1]  | 0.8528 | 1.0633 | <b>0.8861</b> | <b>0.9351</b> | 0.8833        | 0.9465        | 0.8701 | 0.9988 |
| 0.005    | [pca, 102, 51, 1]  | 0.8427 | 1.099  | 0.8584        | 1.0426        | 0.8545        | 1.057         | 0.88   | 0.96   |
| 0.05     | [pca, 102, 102, 1] | 0.8315 | 1.1376 | 0.8498        | 1.0738        | 0.8706        | 0.9968        | 0.8749 | 0.9801 |
| 0.01     | [pca, 102, 102, 1] | 0.7632 | 1.3483 | 0.8359        | 1.1224        | 0.871         | 0.9951        | 0.8833 | 0.9466 |
| 0.005    | [pca, 102, 102, 1] | 0.7375 | 1.4198 | 0.8774        | 0.9701        | 0.8802        | 0.9589        | 0.8844 | 0.9421 |
| Average: |                    | 0.8056 | 1.2163 | 0.8598        | 1.0341        | <b>0.8643</b> | <b>1.0195</b> | 0.8582 | 1.0386 |

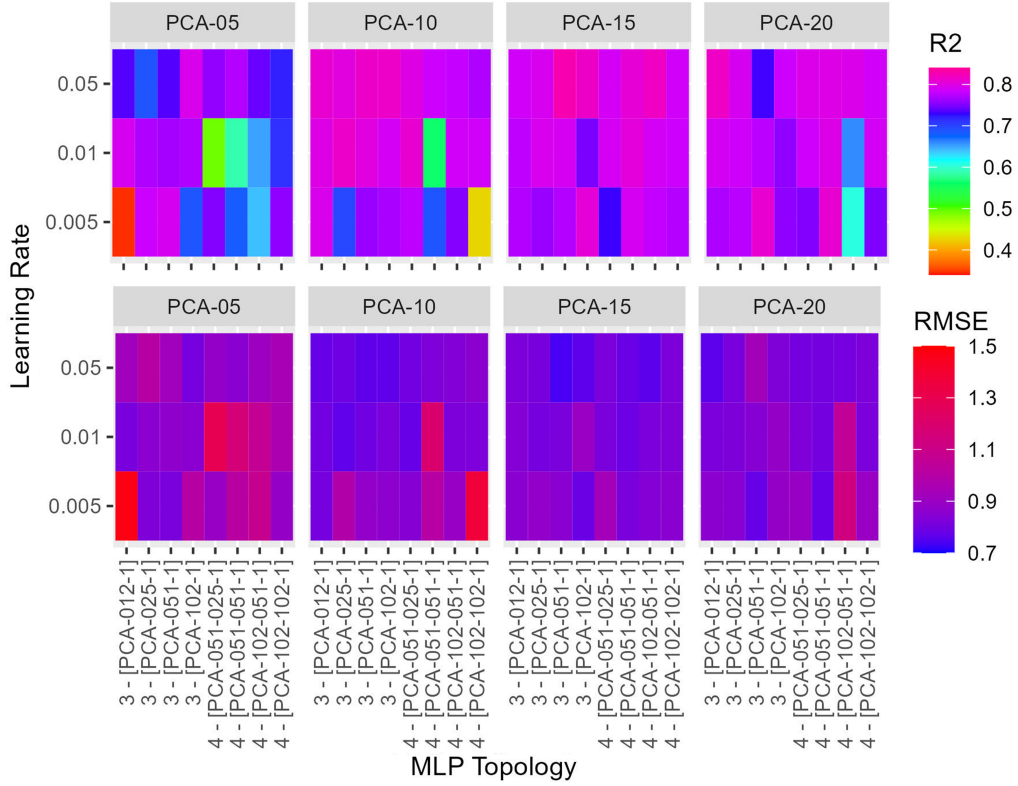

Figure S1: **Graphical representation of the CCC estimation using MLP and PCA.** Results obtained on Grosseto CCC and CNC test sets using only the MLP regressor and PCA features in input with different hyperparameters to estimate the CCC parameter. The model was trained for 1500 epochs for each experiment using the SGD optimizer.

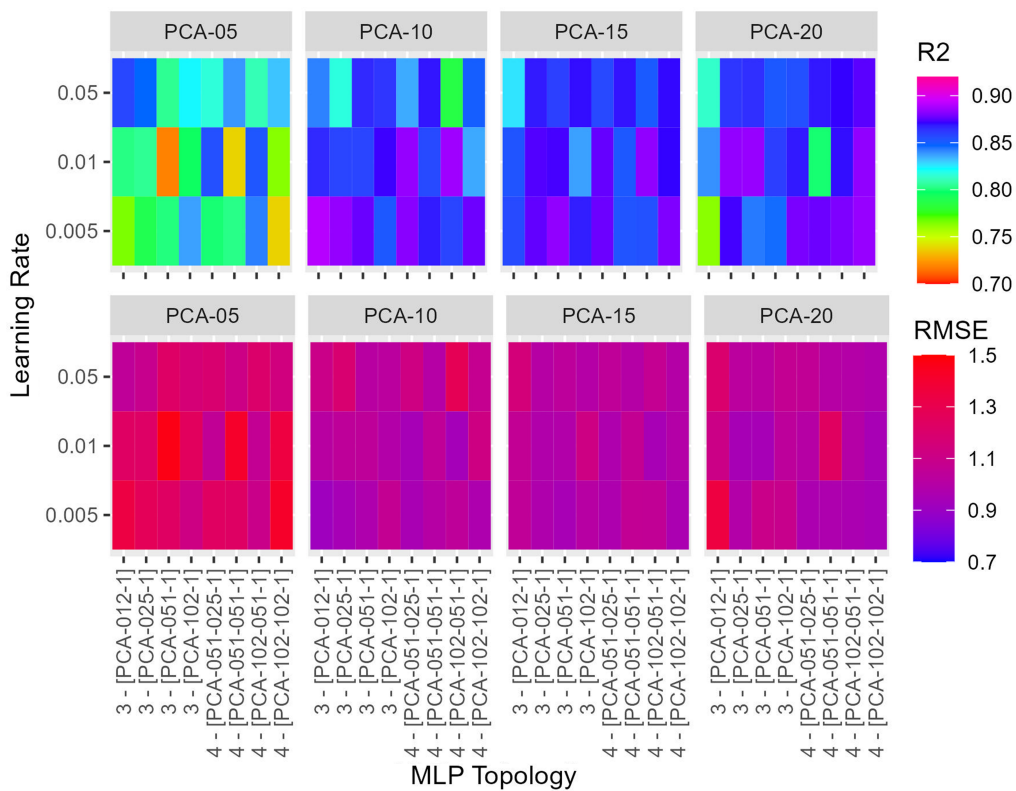

Figure S2: **Graphical representation of the CNC estimation using MLP and PCA.** Results obtained on Grosseto CCC and CNC test sets using only the MLP regressor and PCA features in input with different hyperparameters to estimate the CNC parameter. The model was trained for 1500 epochs for each experiment using the SGD optimizer.
